# Supplementary material
Source: HighWire-hosted journal article supplement (https://bmjopen.bmj.com/content/10/7/e035968)
Supplement: inline-supplementary-material-1 [file inline-supplementary-material-1.pdf]

bmjopen-2019-035968 R.2 Supplementary material

Supplementary Table 1 Trial Characteristics

|                                                                                                                                                                                                                                         | RCT 1                                           | RCT 2                                | RCT 3                      | RCT 4                        | RCT 5                                    | RCT 6                              | RCT 7                      |
|-----------------------------------------------------------------------------------------------------------------------------------------------------------------------------------------------------------------------------------------|-------------------------------------------------|--------------------------------------|----------------------------|------------------------------|------------------------------------------|------------------------------------|----------------------------|
| Intervention                                                                                                                                                                                                                            | Nutrient-enriched                               | Nutrient-enriched                    | LCPUFA                     | LCPUFA                       | Nucleotides                              | Iron                               | Sn-2 palmitate             |
| Population                                                                                                                                                                                                                              | Preterm                                         | SGA Term                             | Preterm                    | Term                         | Term                                     | Term                               | Term                       |
| Years randomised                                                                                                                                                                                                                        | 1993-96                                         | 1993-96                              | 1993-96                    | 1993-95                      | 2000-02                                  | 1993-94                            | 1995-96                    |
| Eligibility                                                                                                                                                                                                                             | <1750g bw<br><37w ga                            | bw <10th centile<br>≥37w ga          | ≤1750g bw<br>≤37w ga       | ≥37w ga                      | ≥37w ga                                  | bw > 2500g, ≥37w ga<br>age: 9m     | ≥37w ga,<br>bw>5th centile |
| Control formula:                                                                                                                                                                                                                        | Term formula                                    | Term formula                         | Preterm formula            | Term formula                 | Term formula                             | Term formula<br>or cow's milk      | Term formula               |
| Intervention:<br>Control formula with<br>added:                                                                                                                                                                                         | Macro nutrients and<br>vitamins                 | Macro nutrients and<br>vitamins      | DHA and AA                 | DHA and AA                   | Nucleotides                              | 12 mg/L iron                       | Sn-2 palmitate             |
| Timing of intervention                                                                                                                                                                                                                  | 1w < discharge - 9m                             | Birth – 12w                          | Birth – 3w                 | Birth – 6m                   | Birth – 20w                              | 9m - 18m                           | Birth – 12w                |
| Centre(s)                                                                                                                                                                                                                               | Nottingham<br>Leicester<br>Cambridge<br>Ipswich | Nottingham<br>Leicester<br>Cambridge | Nottingham<br>Leicester    | Nottingham<br>Leicester      | Nottingham<br>Leicester                  | Nottingham<br>Leicester<br>Norwich | Cambridge                  |
| Total N                                                                                                                                                                                                                                 | 296                                             | 475                                  | 284                        | 447                          | 296                                      | 492                                | 323                        |
| Intervention                                                                                                                                                                                                                            | 113                                             | 152                                  | 96                         | 155                          | 99                                       | 161                                | 103                        |
| Control (1)                                                                                                                                                                                                                             | 115                                             | 147                                  | 100                        | 154                          | 97                                       | 165                                | 100                        |
| Control (2)                                                                                                                                                                                                                             | -                                               | -                                    | -                          | -                            | -                                        | 166                                | -                          |
| Non-randomised<br>breastfed reference                                                                                                                                                                                                   | 68                                              | 176                                  | 88                         | 138                          | 100                                      | -                                  | 120                        |
| % Response at last<br>cognitive follow-up<br>(test, age) *                                                                                                                                                                              | 84% (Bayley score,<br>18m)                      | 6% (IQ score, 17<br>years)           | 9% (IQ score, 16<br>years) | 55% (IQ score,<br>5.5 years) | 81% (Head<br>circumference,<br>20 weeks) | 36% (Bayley score,<br>18m)         | No cognitive<br>follow-up  |
| References                                                                                                                                                                                                                              | 1                                               | 2 3                                  | 4 5                        | 6 7                          | 8 9                                      | 10 11                              | 12 13                      |
| bw=birthweight, ga=gestational age, d=days, w=week(s), m=moths, LCPUFA=Long Chain Polyunsaturated Fatty Acids, SGA=small-for-gestational-age, m=months, DHA=docosahexaenoic acid, AA= arachidonic acid *includes unpublished follow-ups |                                                 |                                      |                            |                              |                                          |                                    |                            |

bmjopen-2019-035968 R.2 Supplementary material

Data cleaning methods:

The party who conducts the linkage (the Fischer Family Trust, FFT) provides up to three likely matching pupil IDs and their school records per participant. Only one of these records can be a true match and it is possible that none of the linked pupil IDs is a true match, as participants might have emigrated, died or attended private schools which do not transmit data to the national pupil database. We will check and cross validate the data provided by FFT extensively, using auxiliary variables from the trials (such as known death) and linkage confidence flags supplied by FFT ([Supplementary Table 2](#)).

Supplementary Table 2 Possible match levels

| Identifier    | Description                                                                               |
|---------------|-------------------------------------------------------------------------------------------|
| First name    | First name and other first name both exact match                                          |
|               | First name matches other name in both directions                                          |
|               | First name exact match                                                                    |
|               | First name matches other name                                                             |
|               | Other name exact match                                                                    |
|               | First name truncated at any hyphen matches                                                |
|               | First name matches via common name alternatives lookup                                    |
|               | Pattern match function                                                                    |
|               | Pattern match function - AND first character of first name matches                        |
|               | First name / surname match in both directions                                             |
| Surname       | No Link                                                                                   |
|               | Surname exact match (including alternative surnames)                                      |
|               | Surname truncated at any hyphen matches                                                   |
|               | Pattern match function                                                                    |
|               | Pattern match function - AND first character of surname matches                           |
|               | First name / surname match in both directions                                             |
| Date of Birth | No Link                                                                                   |
|               | DOB exact match                                                                           |
|               | Day on source matches month on match, and vice versa; year matches (i.e. transposed date) |
|               | Day and month match (i.e. wrong year)                                                     |
|               | Day and year match (i.e. wrong month)                                                     |
|               | Month and year match (i.e. wrong day)                                                     |
|               | Either source or match DOB is 1st January; year matches                                   |
| Location      | Either source or match DOB is 1st September; year matches                                 |
|               | No Link                                                                                   |
|               | Postcode exact match                                                                      |
|               | Local Authority match                                                                     |
|               | Neighbouring / nearby Local Authority match                                               |

bmjopen-2019-035968 R.2 Supplementary material

---

### No Link

---

We will calculate match-weights for each participant-pupil pair according to a probabilistic method adapted from Fellegi and Sunter.<sup>14</sup> These match-weights will then be used to rank the pairs according to their probability of being a true match. For each match category ([Supplementary Table 2](#)) we will derive proxy-m and proxy-u probabilities which will then be used to produce the match weight.

M-probability: probability of agreeing on a category given that it is a true match

U-probability: probability of agreeing on a category given by chance

The original method requires a set of participant-pupil pairs that are certain true matches and a set of participant-pupil pairs that are certain false matches. Due to the de-identified nature of the data, such information will not be available and thus needs to be approximated. True matches will be defined as participants perfectly matching all categories (except the one we are calculating the probability for). Certain false matches will be defined as participants disagreeing in all categories (except the one we are calculating the probability for). This will yield a total of eight reference datasets. For each linkage flag (sex, first name, last name, date of birth, location) we will then calculate the variable weight using:

$$\log_2 (m/u)$$

The final match weight for a participant-pupil pair will be calculated using the sum of all weights in a pair:

$$\sum \log_2 (m/u)$$

At this stage each participant will still have up to three multiple possible matches.

First, we will drop all participants that linked but where their age at first link was >17 and they do not agree with the record on date of birth. This is because the date of birth in the trial data is very likely to be correct as it corresponds to the recruitment periods and was confirmed repeatedly during the follow-up period. We will also discard all records for children that died before school age (4 years) where information on death and time of death during the trial period is available.

We will then rank participant-pupil pairs according to their match weights. If the highest match-weight for a participant is 10% above that of the second best match, we will automatically keep the best match and discard the other(s). If the difference is lower, we will manually review these

## bmjopen-2019-035968 R.2 Supplementary material

records to decide which one is the best match (if any). Decisions taken at manual review will be reported to ensure reproducibility. We will then choose two cut-offs based on visual inspection of the match probabilities; one threshold to maximise sensitivity (many true positive links) and one to maximise specificity (few false positive links). To determine how representative each sample defined by these cut-offs is of the original randomised cohort, we will compare them across the variables that were measured at randomisation. We will use the bigger, more sensitive sample in our analyses but use the smaller, more specific sample in sensitivity analyses.

bmjopen-2019-035968 R.2 Supplementary material

**Trial formula compositions:****RCT 1: Preterm nutrient enriched formula (post-discharge) vs standard formula**

| per 100 ml                           | Standard<br>formula | High-energy<br>formula |
|--------------------------------------|---------------------|------------------------|
| Energy (kcal)                        | 68                  | 72                     |
| Protein (g)                          | 1.45                | 1.85                   |
| Casein                               | 0.56                | 0.72                   |
| Whey                                 | 0.89                | 1.13                   |
| Carbohydrate (g)                     | 6.96                | 7.24                   |
| Lactose (g)                          | 6.96                | 6.20                   |
| Maltodextrin (g)                     | -                   | 1.04                   |
| Fat (g)                              | 3.82                | 3.96                   |
| Minerals                             |                     |                        |
| Calcium (mg)                         | 39                  | 70                     |
| Phosphorus (mg)                      | 27                  | 35                     |
| Sodium (mg)                          | 17                  | 22                     |
| Chloride (mg)                        | 45                  | 45                     |
| Potassium (mg)                       | 57                  | 78                     |
| Iron (mg)                            | 0.65                | 0.65                   |
| Zinc (mg)                            | 0.34                | 0.60                   |
| Copper (µg)                          | 42                  | 57                     |
| Iodine (µg)                          | 4.5                 | 4.5                    |
| Magnesium (mg)                       | 5.2                 | 5.2                    |
| Manganese (µg)                       | 3.4                 | 5                      |
| Vitamins                             |                     |                        |
| Vitamin A (µg)                       | 100                 | 100                    |
| Thiamine B <sub>1</sub> (mg)         | 42                  | 95                     |
| Riboflavin B <sub>2</sub> (mg)       | 55                  | 100                    |
| Niacin B <sub>3</sub> (µg)           |                     |                        |
| Pantothenic acid B <sub>5</sub> (mg) | 0.23                | 0.40                   |
| Pyridoxine B <sub>6</sub> (µg)       | 35                  | 80                     |
| Biotin B <sub>7</sub> (µg)           | 1.0                 | 1.1                    |
| Inositol B <sub>8</sub> (mg)         |                     |                        |
| Folate B <sub>9</sub> (µg)           | 3.4                 | 25                     |
| Cyanocobalamin B <sub>12</sub> (µg)  | 0.14                | 0.2                    |
| Vitamin C (mg)                       | 6.9                 | 15                     |
| Vitamin D (µg)                       | 1.0                 | 1.3                    |
| Vitamin E (mg)                       | 0.48                | 1.5                    |
| Vitamin K (µg)                       | 2.7                 | 6.0                    |
| Choline (mg)                         | 4.8                 | 5.1                    |
| Taurine (mg)                         | 5                   | 5.1                    |
| Carnitine (mg)                       | -                   | 1.1                    |

bmjopen-2019-035968 R.2 Supplementary material

**RCT 2: Term SGA nutrient enriched formula vs standard formula**

| per 100 ml                           | Standard formula | High-energy formula |
|--------------------------------------|------------------|---------------------|
| Energy (kcal)                        | 68               | 72                  |
| Protein (g)                          | 1.45             | 1.85                |
| Casein                               | 0.56             | 0.72                |
| Whey                                 | 0.89             | 1.13                |
| Carbohydrate (g)                     | 6.96             | 7.24                |
| Lactose (g)                          | 6.96             | 6.20                |
| Maltodextrin (g)                     | -                | 1.04                |
| Fat (g)                              | 3.82             | 3.96                |
| Minerals                             |                  |                     |
| Calcium (mg)                         | 39               | 70                  |
| Phosphorus (mg)                      | 27               | 35                  |
| Sodium (mg)                          | 17               | 22                  |
| Chloride (mg)                        | 45               | 45                  |
| Potassium (mg)                       | 57               | 78                  |
| Iron (mg)                            | 0.65             | 0.65                |
| Zinc (mg)                            | 0.34             | 0.60                |
| Copper (µg)                          | 42               | 57                  |
| Iodine (µg)                          | 4.5              | 4.5                 |
| Magnesium (mg)                       | 5.2              | 5.2                 |
| Manganese (µg)                       | 3.4              | 5                   |
| Vitamins                             |                  |                     |
| Vitamin A (µg)                       | 100              | 100                 |
| Thiamine B <sub>1</sub> (mg)         | 42               | 95                  |
| Riboflavin B <sub>2</sub> (mg)       | 55               | 100                 |
| Niacin B <sub>3</sub> (µg)           |                  |                     |
| Pantothenic acid B <sub>5</sub> (mg) | 0.23             | 0.40                |
| Pyridoxine B <sub>6</sub> (µg)       | 35               | 80                  |
| Biotin B <sub>7</sub> (µg)           | 1.0              | 1.1                 |
| Inositol B <sub>8</sub> (mg)         |                  |                     |
| Folate B <sub>9</sub> (µg)           | 3.4              | 25                  |
| Cyanocobalamin B <sub>12</sub> (µg)  | 0.14             | 0.2                 |
| Vitamin C (mg)                       | 6.9              | 15                  |
| Vitamin D (µg)                       | 1.0              | 1.3                 |
| Vitamin E (mg)                       | 0.48             | 1.5                 |
| Vitamin K (µg)                       | 2.7              | 6.0                 |
| Choline (mg)                         | 4.8              | 5.1                 |
| Taurine (mg)                         | 5.0              | 5.1                 |
| Carnitine (mg)                       | -                | 1.1                 |

**RCT 3: Preterm LCPUFA-enriched formula vs standard preterm formula**

| per 100 ml    | Standard formula | LCPUFA-enriched formula |
|---------------|------------------|-------------------------|
| Energy (kcal) | 70               | 70                      |

## bmjopen-2019-035968 R.2 Supplementary material

|                                       |      |      |
|---------------------------------------|------|------|
| Protein (g)                           | 2.0  | 2.0  |
| Casein                                | 0.8  | 0.8  |
| Whey                                  | 1.2  | 1.2  |
| Carbohydrate (g)                      | 7.7  | 7.7  |
| Total fat (g)                         | 3.5  | 3.5  |
| Fatty acid composition (g/ 100 g fat) |      |      |
| C8:0 caprylic                         | 0.7  | 0.6  |
| C10:0 capric                          | 1.2  | 1.1  |
| C12:0 lauric                          | 6.3  | 4.9  |
| C14:0 myristic                        | 5.6  | 5.6  |
| C16:0 palmitic                        | 25.8 | 26.3 |
| C18:0 stearic                         | 8.2  | 8.5  |
| C18:1 oleic                           | 32.6 | 32.9 |
| C18:2 n-6 linoleic                    | 10.6 | 12.0 |
| C18:3 n-6 $\gamma$ -linolenic         | 0.1  | 0.4  |
| C18:3 n-6 $\alpha$ -linolenic         | 0.7  | 0.6  |
| C20:0 arachidic                       | 0.4  | 0.3  |
| C20:1 n-9 eicosanoic                  | 0.2  | 0.3  |
| C20:4 n-6 AA                          | -    | 0.31 |
| C20:5 n-3 eicosapentaenoic            | -    | 0.04 |
| C22:0                                 | 0.3  | 0.2  |
| C22:6 n-3 DHA                         | -    | 0.17 |
| C24:0                                 | 0.2  | 0.1  |
| Other fatty acids                     | 7.1  | 4.62 |
| Cholesterol                           | -    | 7.73 |
| Minerals                              |      |      |
| Calcium (mg)                          | 70   | 70   |
| Phosphorus (mg)                       | 35   | 42   |
| Sodium (mg)                           | 30   | 27   |
| Potassium (mg)                        | 75   | 71   |
| Iron (mg)                             | 0.1  | 0.07 |
| Zinc (mg)                             | 0.39 | 0.4  |
| Vitamins                              |      |      |
| Vitamin A ( $\mu$ g)                  | 63   | 63   |
| Vitamin D ( $\mu$ g)                  | 2.1  | 2.1  |
| Vitamin E (mg)                        | 2.0  | 2.0  |
| Vitamin K ( $\mu$ g)                  | 2.8  | 3.0  |

**RCT 4: Term LCPUFA-enriched formula vs standard term formula**

| per 100 ml                           | Standard formula | LCPUFA-enriched formula |
|--------------------------------------|------------------|-------------------------|
| Energy (kcal)                        | 67               | 67                      |
| Protein (g) (casein:whey 40:60)      | 1.5              | 1.5                     |
| Carbohydrate (g)                     | 7.6              | 7.7                     |
| Lactose (g)                          | 7.6              | 7.7                     |
| Total fat (g)                        | 3.4              | 3.4                     |
| Fatty acid composition (% total fat) |                  |                         |
| C8:0 caprylic                        | 0.8              | 2.0                     |
| C10:0 capric                         | 2.4              | 2.0                     |

## bmjopen-2019-035968 R.2 Supplementary material

|                               |      |      |
|-------------------------------|------|------|
| C12:0 lauric                  | 1.6  | 12.3 |
| C14:0 myristic                | 8.6  | 5.2  |
| C16:0 palmitic                | 23.3 | 25.6 |
| C18:0 stearic                 | 10.2 | 4.6  |
| C18:1 oleic                   | 32.7 | 29.7 |
| C18:2 n-6 linoleic            | 12.4 | 15.9 |
| C18:3 n-6 $\alpha$ -linolenic | 1.1  | 1.4  |
| C20:4 n-6 AA                  | -    | 0.30 |
| C20:5 n-3 eicosapentaenoic    | -    | 0.01 |
| C22:6 n-3 DHA                 | -    | 0.32 |
| Cholesterol                   | <0.5 | 0.8  |
| Minerals                      |      |      |
| Iron (mg)                     | 0.8  | 0.8  |

**RCT 5: Nucleotide-enriched formula vs standard formula**

| per 100 ml                         | Standard formula | Nucleotide-enriched formula |
|------------------------------------|------------------|-----------------------------|
| Energy (kcal)                      | 68               | 68                          |
| Protein (g) (casein:whey 40:60)    | 1.5              | 1.5                         |
| Casein                             | 0.6              | 0.6                         |
| Whey                               | 0.9              | 0.9                         |
| Carbohydrate as lactose (g)        | 7.0              | 7.0                         |
| Total fat (g)                      | 3.8              | 3.8                         |
| C18:2 n-6 linoleic (mg)            | 350              | 350                         |
| C18:3 n-6 $\gamma$ -linolenic (mg) | 33               | 33                          |
| C18:3 n-6 $\alpha$ -linolenic (mg) | 44               | 44                          |
| LCPUFAs (mg)                       | 26               | 26                          |
| Nucleotides                        |                  |                             |
| Cytidine monophosphate (mg)        | 0.3              | 1.5                         |
| Uridine monophosphate (mg)         | -                | 0.5                         |
| Adenosine monophosphate (mg)       | -                | 0.6                         |
| Guanosine monophosphate (mg)       | -                | 0.2                         |
| Inosine monophosphate (mg)         | -                | 0.3                         |
| Minerals                           |                  |                             |
| Calcium (mg)                       | 39               | 39                          |
| Magnesium (mg)                     | 5.2              | 5.2                         |
| Manganese ( $\mu$ g)               | 3.4              | 3.4                         |
| Phosphorus (mg)                    | 27               | 27                          |
| Sodium (mg)                        | 17               | 17                          |
| Potassium (mg)                     | 0.3              | 0.3                         |
| Iron (mg)                          | 0.6              | 0.6                         |
| Zinc (mg)                          | 0.3              | 0.3                         |
| Copper ( $\mu$ g)                  | 42               | 42                          |
| Iodine ( $\mu$ g)                  | 4.5              | 4.5                         |
| Vitamins                           |                  |                             |
| Vitamin A ( $\mu$ g)               | 100              | 100                         |
| Thiamine B <sub>1</sub> (mg)       | 42               | 42                          |
| Riboflavin B <sub>2</sub> (mg)     | 55               | 55                          |



## bmjopen-2019-035968 R.2 Supplementary material

|                                      |      |      |
|--------------------------------------|------|------|
| Niacin B <sub>3</sub> (mg)           | 0.7  | 0.7  |
| Pantothenic acid B <sub>5</sub> (µg) | 0.2  | 0.2  |
| Biotin B <sub>7</sub> (µg)           | 1.0  | 1.0  |
| Vitamin B <sub>8</sub> (µg)          | 35   | 35   |
| Folic Acid B <sub>9</sub> (µg)       | 3.4  | 3.4  |
| Cyanocobalamin B <sub>12</sub> (µg)  | 0.14 | 0.14 |
| Vitamin C (mg)                       | 6.9  | 6.9  |
| Vitamin D (µg)                       | 1.0  | 1.0  |
| Vitamin E (mg)                       | 0.5  | 0.5  |
| Vitamin K (µg)                       | 2.7  | 2.7  |
| Choline (mg)                         | 4.8  | 4.8  |
| Taurine (mg)                         | 5.0  | 5.0  |

**RCT 6: Iron-enriched formula vs standard formula**

| per 100 ml                           | Standard formula | Iron-enriched formula |
|--------------------------------------|------------------|-----------------------|
| Energy (kcal)                        | 65               | 65                    |
| Protein (g)                          | 2.5              | 2.5                   |
| Carbohydrate (g)                     | 8.0              | 8.0                   |
| Lactose (g)                          | 6.4              | 6.4                   |
| Maltodextrin                         | 1.6              | 1.6                   |
| Fat (g)                              | 2.8              | 2.8                   |
| Saturated (%)                        | 42.9             | 42.9                  |
| Unsaturated (%)                      | 57.1             | 57.1                  |
| Minerals                             |                  |                       |
| Calcium (mg)                         | 100              | 100                   |
| Phosphorus (mg)                      | 65               | 65                    |
| Magnesium (mg)                       | 7.5              | 7.5                   |
| Sodium (mg)                          | 30               | 30                    |
| Potassium (mg)                       | 100              | 100                   |
| Chloride (mg)                        | 70               | 70                    |
| Iron (mg)                            | 0.9              | 1.2                   |
| Zinc (mg)                            | 0.5              | 0.5                   |
| Iodine (µg)                          | 6.9              | 6.9                   |
| Vitamins                             |                  |                       |
| Vitamin A (µg)                       | 6.9              | 6.9                   |
| Thiamine B <sub>1</sub> (mg)         | 0.8              | 0.8                   |
| Riboflavin B <sub>2</sub> (mg)       | 0.12             | 0.12                  |
| Niacin B <sub>3</sub> (µg)           | 0.61             | 0.61                  |
| Pantothenic acid B <sub>5</sub> (µg) | 0.24             | 0.24                  |
| Pyridoxine B <sub>6</sub> (µg)       | 48               | 48                    |
| Biotin B <sub>7</sub> (µg)           | 1.71             | 1.71                  |
| Inositol B <sub>8</sub> (mg)         |                  |                       |
| Folate B <sub>9</sub> (µg)           | 6.0              | 6.0                   |
| Cyanocobalamin B <sub>12</sub> (µg)  | 0.12             | 0.12                  |

bmjopen-2019-035968 R.2 Supplementary material

|                |      |      |
|----------------|------|------|
| Vitamin C (µg) | 6.6  | 6.6  |
| Vitamin D (µg) | 1.2  | 1.2  |
| Vitamin E (mg) | 0.75 | 0.75 |
| Vitamin K (µg) | 6.6  | 6.6  |

**RCT 7: sn-2 Palmitate enriched formula vs standard formula**

| per 100 ml                           | Standard formula   | sn-2 Palmitate enriched formula |
|--------------------------------------|--------------------|---------------------------------|
| Energy (kcal)                        | 70                 | 73                              |
| Protein (g)                          | 1.6                | 1.6                             |
| Carbohydrate (g)                     | 7.1                | 7.1                             |
| Lactose (g)                          | 7.1                | 7.1                             |
| Total fat (g)                        | 3.9                | 4.2                             |
| Fatty acid composition (% total fat) |                    |                                 |
| C8:0 caprylic                        | 1.6                | 1.5                             |
| C10:0 capric                         | 0.5                | 0.4                             |
| C12:0 lauric                         | 10.3               | 12.4                            |
| C14:0 myristic                       | 4.9                | 4.7                             |
| C16:0 palmitic                       | 19.6 (12% in sn-2) | 20.1 (50% in sn-2)              |
| C18:0 stearic                        | 3.9                | 3.1                             |
| C18:1 n-9 oleic                      | 41.3               | 42                              |
| C18:2 n-6 linoleic                   | 12.1               | 13                              |
| C18:3 n-3 α-linolenic                | 1.9                | 1.6                             |
| Other fatty acids                    | 4.0                | 1.2                             |
| Minerals                             |                    |                                 |
| Calcium (mg)                         | 54                 | 57                              |
| Phosphorus (mg)                      | 32                 | 33                              |
| Sodium (mg)                          | 23                 | 23                              |
| Potassium (mg)                       | 76                 | 74                              |
| Chloride (mg)                        | 45                 | 44                              |
| Magnesium (mg)                       | 6.3                | 6.3                             |
| Manganese (µg)                       | 5.1                | 5.2                             |
| Iron (mg)                            | 0.51               | 0.57                            |
| Zinc (mg)                            | 0.45               | 0.49                            |
| Copper (µg)                          | 44                 | 45                              |
| Iodine (µg)                          | 10                 | 10                              |
| Vitamins                             |                    |                                 |
| Vitamin A (µg)                       | 92                 | 95                              |
| Thiamine B <sub>1</sub> (µg)         | 40                 | 40                              |
| Riboflavin B <sub>2</sub> (µg)       | 100                | 100                             |
| Pyridoxine B <sub>6</sub> (µg)       | 40                 | 40                              |
| Vitamin D (µg)                       | 1.1                | 1.1                             |
| Vitamin K (µg)                       | 5                  | 5                               |
| Vitamin E (mg)                       | 1.1                | 1.1                             |

bmjopen-2019-035968 R.2 Supplementary material

## References:

1. Lucas A, Fewtrell MS, Morley R, et al. Randomized trial of nutrient-enriched formula versus standard formula for postdischarge preterm infants. *Pediatrics* 2001;108(3):703-11. [published Online First: 2001/09/05]
2. Fewtrell MS, Morley R, Abbott RA, et al. Catch-up growth in small-for-gestational-age term infants: a randomized trial. *The American journal of clinical nutrition* 2001;74(4):516-23. doi: 10.1093/ajcn/74.4.516 [published Online First: 2001/09/22]
3. Morley R, Fewtrell MS, Abbott RA, et al. Neurodevelopment in children born small for gestational age: a randomized trial of nutrient-enriched versus standard formula and comparison with a reference breastfed group. *Pediatrics* 2004;113(3 Pt 1):515-21. [published Online First: 2004/03/03]
4. Fewtrell MS, Morley R, Abbott RA, et al. Double-Blind, Randomized Trial of Long-Chain Polyunsaturated Fatty Acid Supplementation in Formula Fed to Preterm Infants. *Pediatrics* 2002;110(1):73-82. doi: 10.1542/peds.110.1.73
5. Fewtrell MS, Abbott RA, Kennedy K, et al. Randomized, double-blind trial of long-chain polyunsaturated fatty acid supplementation with fish oil and borage oil in preterm infants. *The Journal of pediatrics* 2004;144(4):471-9. doi: 10.1016/j.jpeds.2004.01.034 [published Online First: 2004/04/08]
6. Lucas A, Stafford M, Morley R, et al. Efficacy and safety of long-chain polyunsaturated fatty acid supplementation of infant-formula milk: a randomised trial. *Lancet* (London, England) 1999;354(9194):1948-54. doi: 10.1016/s0140-6736(99)02314-4 [published Online First: 2000/01/06]
7. Singhal A, Morley R, Cole TJ, et al. Infant nutrition and stereoacuity at age 4-6 y. *The American journal of clinical nutrition* 2007;85(1):152-9. doi: 10.1093/ajcn/85.1.152 [published Online First: 2007/01/09]
8. Singhal A, Kennedy K, Lanigan J, et al. Dietary Nucleotides and Early Growth in Formula-Fed Infants: A Randomized Controlled Trial. *Pediatrics* 2010;126(4):e946-e53. doi: 10.1542/peds.2009-2609
9. Singhal A, Macfarlane G, Macfarlane S, et al. Dietary nucleotides and fecal microbiota in formula-fed infants: a randomized controlled trial. *The American journal of clinical nutrition* 2008;87(6):1785-92. [published Online First: 2008/06/11]
10. Morley R, Abbott R, Fairweather-Tait S, et al. Iron fortified follow on formula from 9 to 18 months improves iron status but not development or growth: a randomised trial. *Archives of Disease in Childhood* 1999;81(3):247-52. doi: 10.1136/adc.81.3.247
11. Singhal A, Morley R, Abbott R, et al. Clinical safety of iron-fortified formulas. *Pediatrics* 2000;105(3):E38. doi: 10.1542/peds.105.3.e38 [published Online First: 2000/03/04]
12. Kennedy K, Fewtrell MS, Morley R, et al. Double-blind, randomized trial of a synthetic triacylglycerol in formula-fed term infants: effects on stool biochemistry, stool characteristics, and bone mineralization. *The American journal of clinical nutrition* 1999;70(5):920-7. doi: 10.1093/ajcn/70.5.920 [published Online First: 1999/10/28]
13. Fewtrell MS, Kennedy K, Murgatroyd PR, et al. Breast-feeding and formula feeding in healthy term infants and bone health at age 10 years. *Br J Nutr* 2013;110(6):1061-7. doi: 10.1017/s0007114512006149 [published Online First: 2013/02/08]
14. Fellegi IP, Sunter AB. A Theory for Record Linkage. *Journal of the American Statistical Association* 1969;64(328):1183-210. doi: 10.1080/01621459.1969.10501049
